# Supplementary material for: Advanced Xenograft Model with Cotransplantation of Patient-Derived Organoids and Endothelial Colony-Forming Cells for Precision Medicine
Source: Hindawi journal article supplement (doi:10.1155/2021/9994535), 2021-07-13
Supplement: f1 [file 9994535.f1.pdf]

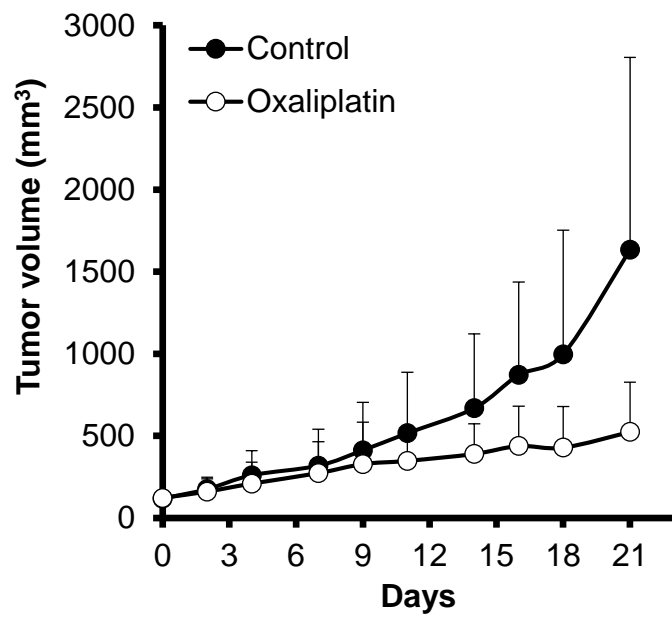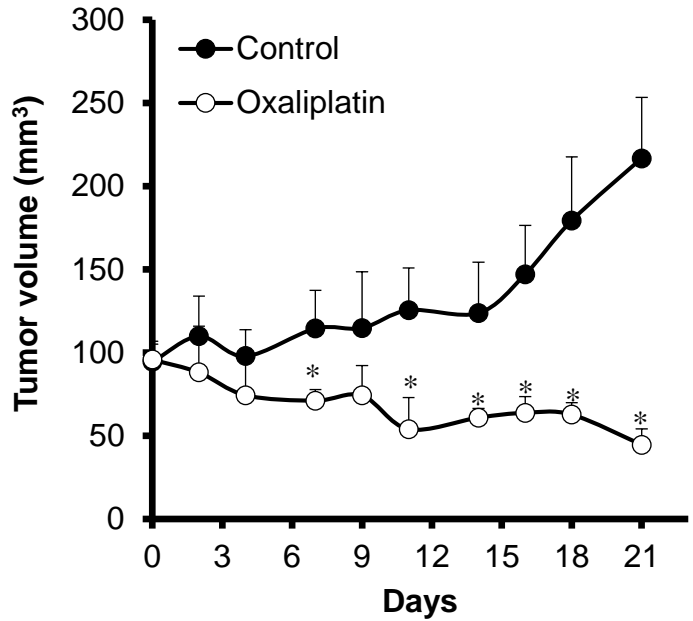

### Supplementary Figure 1. Sensitivity of oxaliplatin in PDOX

Oxaliplatin (5 mg/kg) was intraperitoneally injected in xenograft models bearing patient-derived organoids (left, 5T patient; right, 8T patient) 3 times per week for 3 weeks. Tumor size was measured 3 times per week by caliper. Tumor volume was calculated following as:  $0.5 \times (\text{the longest diameter}) \times (\text{the shortest diameter})^2$ . Data presented as mean  $\pm$  standard deviation (n = 4/group). Significance: \*, p < 0.05 (Student's *t*-test).
